# Supplementary material
Source: PubMed Central journal article supplement (PMC2597601)
Supplement: blood-2008-01-133702_2.pdf [file blood-2008-01-133702_2.pdf]

| Exon      | Primer Sequence (5' - 3') |                        | Annealing Temp (°C) |
|-----------|---------------------------|------------------------|---------------------|
|           | Forward                   | Reverse                |                     |
| 1         | atggattgagaaatctgggg      | aaccacaaacacccaaactca  | 63                  |
| 2         | agagaagataatggcattggc     | tagaaagggagaagacagaag  | 55                  |
| 3 and 4   | gaagaccaagaataatgggca     | tcttctctgtctctctcgat   | 60                  |
| 5 and 6   | tagacctgtgcacagagaat      | tttctctgtaggtccactat   | 60                  |
| 7         | aagatccgagcctactatgaa     | gtcccccacctggtcttacc   | 62                  |
| 8         | ccagcagtgggtgggggctc      | tgagcctggccttcagact    | 63                  |
| 9         | tcaagcgcattccggtacc       | tgagcctggccttcagact    | 60                  |
| 10 and 11 | gtatgaaagtggacttactc      | tctgtatgcaaatacagaggac | 60                  |
| 12 and 13 | ttaagaaaggccaccaattcc     | aaaaggagaaagggagagaga  | 60                  |
| 14        | aacctttctgtttccactc       | cattcccattctcagctcaa   | 60                  |
| 15        | agagatacacaggtgcatatg     | cccatttgatggaagagcaaa  | 60                  |
| 16        | ttgctcttccatcaaatggg      | cagtccaggaagaccttctg   | 55                  |
| 17        | ccgagccccaccccaggagac     | cagccccaccccaccagaca   | 67                  |
| 18 and 19 | ttcaccatgtagcttaggt       | aatgagatgacactcagacac  | 60                  |
| 20 and 21 | tttagttcacaggcttcagca     | cctaagctggacactatgatt  | 60                  |
| 22 and 23 | atctgtgtgtctgtctgttct     | aagagaaaggtgctgggttaa  | 60                  |
| 24        | ttactgctggtgaaatgagac     | ttgagatgaggtgggatctta  | 60                  |
| 25        | tgagtccctcccttttaagg      | tccgtgcttaaggatgcttaa  | 54                  |
| 26        | ttaagcatccttaagcacgga     | atcttgcaaaggaattggg    | 60                  |
| 27        | taacacctagaagagactcag     | atgactgcagtgatgtctgtt  | 60                  |
| 28        | tgatccttactaacgtgacag     | tcagagaaagctcagaaagag  | 54                  |
| 29        | ctctttctgagctttctctga     | aactgattctcaactccactg  | 60                  |
| 30        | cagtggagttgagaatcagtt     | ccactcatgaagaacagaatg  | 60                  |
| 31        | cagctctgattgaacctctt      | ttgggaattaagccttctgct  | 60                  |
| 32 to 34  | agcagaaggcttaattcccaa     | attcttgctagagatagaggg  | 60                  |
| 35 and 36 | tcctaaaaaatgtaacgcccc     | agaaagaccagccagatagag  | 60                  |
| 37        | ttgatccttcagtttctccac     | ttctcagatccccacaattca  | 60                  |
| 38 and 39 | ccttatcctctcatcttca       | acaattggacacacacagcta  | 60                  |
| 40 to 42  | atagtgtgactggctgtgatt     | actgaagctttatctggagtg  | 60                  |
