# Supplementary material
Source: PubMed Central journal article supplement (PMC2597601)
Supplement: blood-2008-01-133702_3.pdf [file blood-2008-01-133702_3.pdf]

|                                                        |          |          |               |          |          |          |           |           |           |           |          |           |           |           |
|--------------------------------------------------------|----------|----------|---------------|----------|----------|----------|-----------|-----------|-----------|-----------|----------|-----------|-----------|-----------|
| <b>Patient number</b>                                  | 1 (IV:1) | 2 (IV:8) | 3 (V:9)       | 4        | 5        | 6        | 7         | 8         | 9         | 10        | 11       | 12        | 13        | 14        |
| <b>Sex</b>                                             | M        | F        | M             | F        | M        | F        | M         | M         | M         | F         | F        | M         | M         | M         |
| <b>Age at presentation (years)</b>                     | 40       | 21       | 16 months     | 22       | 7        | 30       | 23        | 28 months | 6         | 2         | 23       | 10 months | 8 months  | 3         |
| <b>C3 (mg/L)</b>                                       | 570      | 550      | 380           | 479      | 380      | 613      | 483       | 510       | 416       | 555       | 540      | 350       | 570       | 611       |
| <b>FH (g/l)</b>                                        | 0.70     | 0.55     | 0.50          | 0.50     | 0.56     | 0.56     | 0.64      | 0.60      | 0.58      | 0.49      | 0.67     | 0.64      | 0.61      | 0.42      |
| <b>FI (mg/l)</b>                                       | 83       | 61       | 65            | 89       | 45       | 70       | 65        | 56.4      | 88        | 64        | 61       | 49        | 53        | 64        |
| <b>Nucleotide change</b>                               | 1774 C>T | 1774 C>T | 1774 C>T      | 1775 G>A | 1775 G>A | 1775 G>A | 2203 C>T  | 2203 C>T  | 2562 C>G  | 3281 C>T  | 3343 G>A | 3474 C>G  | 3481 C>A  | 4390 C>G  |
| <b>Exon</b>                                            | 14       | 14       | 14            | 14       | 14       | 14       | 17        | 17        | 20        | 26        | 26       | 27        | 27        | 37        |
| <b>Amino acid change</b>                               | R570W    | R570W    | R570W         | R570Q    | R570Q    | R570Q    | R713W     | R713W     | Y832X     | A1072V    | D1093N   | C1136W    | Q1139K    | H1442D    |
| <b>Sporadic/Familial</b>                               | F        | F        | F             | S        | F        | F        | F         | S         | S         | S         | S        | S         | S         | F         |
| <b>Follow-up (y)</b>                                   | 13       | 29       | 12            | 3        | 32       | 20       | 30        | 16        | 4         | 13        | 19       | 2         | 4         | 10        |
| <b>Renal outcome</b>                                   | ESRD     | ESRD     | ESRD          | ESRD     | ESRD     | ESRD     | Recovered | ESRD      | Recovered | Recovered | ESRD     | CKD       | Recovered | Recovered |
| <b>Number of transplants</b>                           | 2        | 1        | 2             | 0        | 3        | 2        | 0         | 0         | 0         | 0         | 2        | 0         | 0         | 0         |
| <b>Number of transplants affected by recurrent HUS</b> | 2        | 0        | 2             | 0        | 0        | 1        | 0         | 0         | 0         | 0         | 0        | 0         | 0         | 0         |
| <b>Healthy carriers</b>                                | n/a      | n/a      | Father (IV:9) | Mother   | n/a      | n/a      | n/a       | n/a       | Mother    | Father    | n/a      | Mother    | n/a       | Mother    |

Abbreviations. ESRD, end stage renal disease; CKD, chronic kidney disease not requiring dialysis.

Normal ranges: C3 680-1380 mg/l, FH 0.34-0.68 g/L, FI 42 –78 mg/L.

The figures in parentheses after patient numbers 1, 2, and 3 refer to the pedigree shown in Fig. S1.

n/a, not available
